## Correction: MiR-129 blocks estrogen induction of NOTCH signaling activity in breast cancer stem-like cells

Guodong Xiao<sup>1,\*</sup>, Xiang Li<sup>1,\*</sup>, Gang Li<sup>1,\*</sup>, Boxiang Zhang<sup>1</sup>, Chongwen Xu<sup>2</sup>, Sida Qin<sup>1</sup>, Ning Du<sup>1</sup>, Jichang Wang<sup>3</sup>, Shou-Ching Tang<sup>4,5</sup>, Jing Zhang<sup>1</sup>, Hong Ren<sup>1</sup>, Ke Chen<sup>6</sup> and Xin Sun<sup>1</sup>

<sup>1</sup>Department of Thoracic Surgery and Oncology, The Second Department of Thoracic Surgery, Cancer Center, The First Affiliated Hospital of Xi'an Jiaotong University, Xi'an 710061, China

<sup>2</sup>Department of Otorhinolaryngology, The First Affiliated Hospital of Xi'an Jiaotong University, Xi'an 710061, China

<sup>3</sup>Department of Vascular and Endovascular Surgery, The First Affiliated Hospital of Xi'an Jiaotong University, Xi'an 710061, China

<sup>4</sup>Breast Cancer Program and Interdisciplinary Translational Research Team, Georgia Regents University Cancer Center, Augusta, Georgia 30912, United States

<sup>5</sup>Tianjin Medical University Cancer Institute and Hospital, Tianjin 300060, China

<sup>6</sup>Department of Urology, Union Hospital, Tongji Medical College, Huazhong University of Science and Technology, Wuhan 430022, China

\* These authors are considered as co-first authors

Published: September 15, 2023

Copyright: © 2023 Xiao et al. This is an open access article distributed under the terms of the [Creative Commons Attribution License](https://creativecommons.org/licenses/by/3.0/) (CC BY 3.0), which permits unrestricted use, distribution, and reproduction in any medium, provided the original author and source are credited.

**This article has been corrected:** In Figure 3D, the MCF-7 'Control' image is an accidental duplicate of the ZR75-1 'Control' image. The corrected Figure 3, produced using the original data, is shown below. The authors declare that these corrections do not change the results or conclusions of this paper.

Original article: Oncotarget. 2017; 8:103261–103273. <https://doi.org/10.18632/oncotarget.21143>

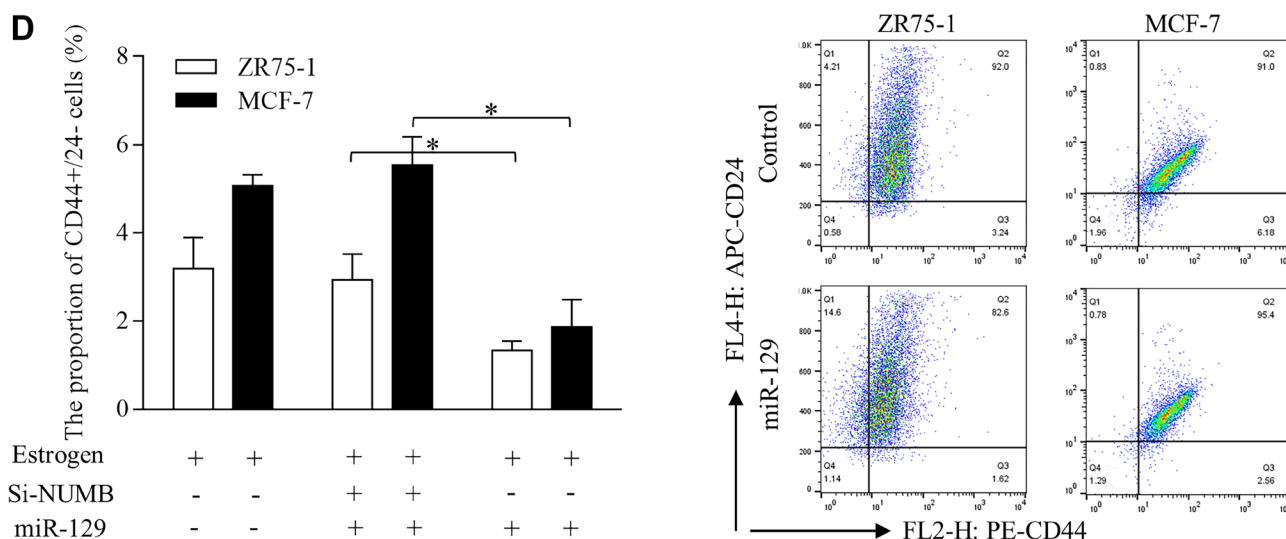

**Figure 3: Suppressive miR-129 functions through inhibition on ESR1 and NOTCH signaling in breast cancer stem cells. (D)** Enforced miR-129 expression decreased the proportion of CD44+/24- cells significantly, however NUMB inhibition induced NOTCH activation abolished the suppressive functions of miR-129.
